# Supplementary material
Source: PubMed Central journal article supplement (PMC3107030)

# Enantioconvergent Synthesis of (+)-Aphanorphine via Asymmetric Pd-Catalyzed Alkene Carboamination.

Duy N. Mai, Brandon R. Rosen, and John P. Wolfe\*

*Department of Chemistry, University of Michigan, 930 N. University Avenue, Ann Arbor, Michigan 48109-1055*

## Supporting Information

Experimental procedures, characterization data for new compounds, and copies of NMR spectra.

## Table of Contents

|                                                            |    |
|------------------------------------------------------------|----|
| General Considerations                                     | S1 |
| Experimental Procedures and Compound Characterization Data | S2 |
| References                                                 | S8 |
| Copies of NMR Spectra                                      | S9 |

**General:** All reactions were carried out under a nitrogen atmosphere in flame-dried glassware. Tris(dibenzylideneacetone)dipalladium and (*R*)-Siphos-PE were purchased from Strem Chemical Co. and used without further purification. All reagents were obtained from commercial sources and were used as obtained. Toluene, THF, methylene chloride and diethyl ether were purified using a GlassContour solvent purification system. The yields reported in the Supporting Information describe the result of a single experiment, whereas the yields reported in Schemes 1–4 are average yields of two or more experiments. Thus, the yields reported in the Supporting Information may differ from those shown in Schemes 1–4.

### Experimental Procedures and Compound Characterization Data.

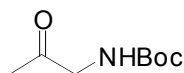

***tert*-Butyl (2-oxopropyl)carbamate (10).**<sup>1</sup> A flame-dried flask was cooled under a stream of nitrogen and charged with pyridinium chlorochromate (12.3 g, 57 mmol) and CH<sub>2</sub>Cl<sub>2</sub> (50 mL). The flask was cooled in an ice-water bath and (±)-*tert*-butyl (2-hydroxypropyl)carbamate (5.0 g in 10 mL CH<sub>2</sub>Cl<sub>2</sub>, 28.5 mmol) was added to the solution. The resulting mixture was stirred overnight at rt, then Et<sub>2</sub>O (100 mL) was added. The resulting black tar was filtered through a plug of silica gel and concentrated. The crude product was purified by flash chromatography on silica gel to afford 4.7 g (96%) of the title compound as a yellow oil. Spectroscopic properties were consistent with those reported in the literature.<sup>1</sup> <sup>1</sup>H NMR (400 MHz, CDCl<sub>3</sub>) δ 5.21 (s, br, 1 H), 4.03 (d, *J* = 4.5 Hz, 2 H), 2.18 (s, 3 H), 1.44 (s, 9 H).

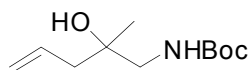

**(±)-*tert*-Butyl (2-hydroxy-2-methylpent-4-en-1-yl)carbamate (11).** A flame-dried flask was cooled under a stream of nitrogen and charged with a solution of allylmagnesium bromide (92 mL, 1 M in Et<sub>2</sub>O) and additional Et<sub>2</sub>O (25 mL). The resulting solution was cooled in an ice-water bath and a solution of *tert*-butyl (2-oxopropyl)carbamate (8.0 g, 46 mmol) in Et<sub>2</sub>O (25 mL) was added slowly via syringe. The resulting mixture was warmed to rt and stirred until the starting material was consumed as judged by TLC analysis (ca. 1.5 h). The mixture was then cooled in an ice-water bath and the reaction was quenched by the slow addition of water (100 mL). The mixture was transferred to a separatory funnel and the layers were separated. The aqueous layer was extracted with Et<sub>2</sub>O (2 x 100 mL), and the combined organic layers were dried over anhydrous Na<sub>2</sub>SO<sub>4</sub>, filtered, and concentrated to afford 9.3 g (94%) of the title compound as a brown oil that was used without further purification. <sup>1</sup>H NMR (500 MHz, CDCl<sub>3</sub>) δ 5.95–5.81 (m, 1 H), 5.21–5.07 (m, 2 H), 4.90 (s, br, 1 H), 3.13 (d, *J* = 6.2 Hz, 2 H), 2.40 (s, 1 H), 2.23 (d, *J* = 7.4 Hz, 2 H), 1.45 (s, 9 H), 1.16 (s, 3 H); <sup>13</sup>C NMR (125 MHz, CDCl<sub>3</sub>) δ 156.7, 133.4, 118.3, 79.1, 72.2, 49.6, 44.2, 28.1, 24.1; IR (film) 3369, 1694 cm<sup>-1</sup>; MS (ESI): 238.1417 (238.1419 calc for C<sub>11</sub>H<sub>21</sub>NO<sub>3</sub>, M + Na<sup>+</sup>).

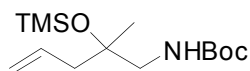

**(±)-*tert*-Butyl {2-methyl-2-[(trimethylsilyloxy)pent-4-en-1-yl]}carbamate (5).** A flame-dried round bottom flask equipped with a stirbar was cooled under a stream of nitrogen and charged with (±)-*tert*-butyl (2-hydroxy-2-methylpent-4-en-1-yl)carbamate (5.0 g, 23 mmol). Neat 1-(trimethylsilyl)-1H-imidazole (6.8 mL, 46 mmol) was added and the resulting mixture was stirred at rt until the starting material had been consumed as judged by TLC analysis (ca. 4 h). Water (10 mL) was added and the resulting mixture was extracted with CH<sub>2</sub>Cl<sub>2</sub> (4 x 20 mL). The combined organic layers were dried over anhydrous Na<sub>2</sub>SO<sub>4</sub>, filtered, and concentrated. The crude product was purified by flash chromatography on silica gel to afford 6.0 g (90%) of the title compound as a pale yellow oil. <sup>1</sup>H NMR (400 MHz, CDCl<sub>3</sub>) δ 5.87–5.73 (m, 1 H), 5.09–5.01 (m, 2 H), 4.74 (s, br, 1 H), 3.16–2.99 (m, 2 H), 2.23 (d, *J* = 7.2 Hz, 2 H), 1.45 (s, 9 H), 1.19 (s, 3 H), 0.13 (s, 9 H). <sup>13</sup>C NMR (100 MHz, CDCl<sub>3</sub>) δ 156.1, 133.9, 117.9, 79.0, 75.7, 50.0, 45.2, 28.3, 24.9, 2.5; IR (film) 3368, 1720 cm<sup>-1</sup>; MS (ESI): 310.1815 (311.1833 calcd for C<sub>14</sub>H<sub>29</sub>NO<sub>3</sub>Si, M + Na<sup>+</sup>).

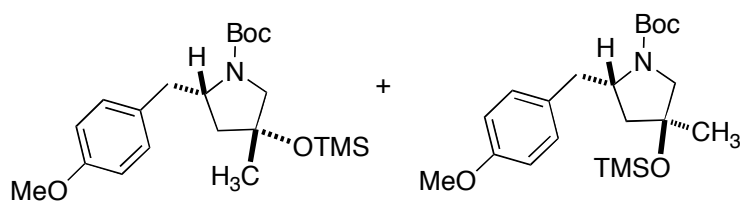

**(+)-(2*S*,4*RS*)-*tert*-Butyl 2-(4-methoxybenzyl)-4-methyl-4-[(trimethylsilyloxy)pyrrolidine-1-carboxylate (6a-b).** A flame-dried Schlenk tube was cooled under a stream of nitrogen and charged with Pd<sub>2</sub>(dba)<sub>3</sub> (191 mg, 0.2 mmol), (*R*)-Siphos-PE (303 mg, 0.06 mmol) and NaO<sup>t</sup>Bu (960 mg, 0.5 mmol). The tube was evacuated and backfilled with nitrogen three times, then a solution of (±)-*tert*-butyl {2-methyl-2-[(trimethylsilyloxy)pent-4-en-1-yl]}carbamate (3.0 g, 10 mmol) and 4-bromoanisole (3.74 g, 20 mmol) in toluene (30 mL) was added via syringe. The resulting mixture was stirred at rt for 1 min then was immersed in 90 °C oil bath and stirred overnight (ca 14 h). The mixture was then cooled to room temperature and saturated aqueous ammonium chloride (10 mL) was added. The mixture was transferred to a separatory funnel, the layers were separated, and the aqueous layer was extracted with EtOAc (3 x 30 mL). The combined organic layers were dried over anhydrous Na<sub>2</sub>SO<sub>4</sub>, filtered, and concentrated. The crude product was purified by flash chromatography on silica gel to afford 3.1 g (75%) of the

title compound as a pale yellow oil. The product was judged to be a 1:1 mixture of rotamers and a 1:1 mixture of diastereomers by  $^1\text{H}$  NMR analysis. Data are for the mixture.  $[\alpha]_{\text{D}}^{23} +18.4$  ( $c$  1.0,  $\text{CH}_2\text{Cl}_2$ );  $^1\text{H}$  NMR (400 MHz,  $\text{CDCl}_3$ )  $\delta$  7.17–7.03 (m, 2 H), 6.86–6.78 (m, 2 H), 4.19–3.82 (m, 1 H), 3.79 (s, 3 H), 3.76–3.10 (m, 2 H), 2.93–2.54 (m, 2 H), 1.94–1.79 (m, 1 H), 1.77–1.66 (m, 1 H), 1.55–1.47 (m, 9 H), 1.33–1.26 (m, 3 H), 0.14 (s, 4.5 H), 0.07 (s, 4.5 H);  $^{13}\text{C}$  NMR (100 MHz,  $\text{CDCl}_3$ )  $\delta$  157.8, 157.7, 154.9, 154.7, 154.3, 130.8, 130.5, 130.3, 130.2, 130.0, 126.5, 113.6, 113.5, 113.4, 113.3, 79.0, 78.9, 78.8, 78.6, 78.0, 77.8, 77.6, 59.9, 59.7, 59.1, 59.0, 58.8, 58.2, 57.9, 54.7, 46.6, 45.5, 44.5, 43.4, 39.6, 39.4, 38.3, 38.2, 28.3, 28.1, 28.0, 26.6, 26.5, 24.8, 24.7, 2.2, 1.9, 1.8, 1.7; IR (film) 2972, 1699, 1684  $\text{cm}^{-1}$ ; MS (ESI): 416.2228 (416.2233 calcd for  $\text{C}_{21}\text{H}_{35}\text{NO}_4\text{Si}$ ,  $\text{M} + \text{Na}^+$ ).

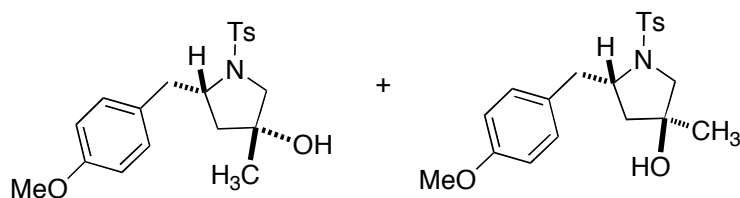

**(+)-(5*S*,3*RS*)-5-(4-Methoxybenzyl)-3-methyl-1-tosylpyrrolidin-3-ol (12a-b).**<sup>2</sup> A round bottomed flask equipped with a stirbar was charged with (+)-(2*S*,4*RS*)-*tert*-Butyl 2-(4-methoxybenzyl)-4-methyl-4-[(trimethylsilyl)oxy]pyrrolidine-1-carboxylate and  $\text{CH}_2\text{Cl}_2$  (7.6 mL). The resulting solution was cooled to 0 °C, trifluoroacetic acid (5.7 mL, 76.2 mmol) was added, and the solution was warmed to rt and stirred until the starting material had been consumed as judged by TLC analysis (ca. 10 min). The reaction mixture was diluted with water, basified with  $\text{NH}_4\text{OH}$ , and transferred to a separatory funnel. The layers were separated and the aqueous layer was extracted with  $\text{CH}_2\text{Cl}_2$  (3 x 50 mL). The combined organic layers were dried over anhydrous  $\text{Na}_2\text{SO}_4$ , filtered, and concentrated. The crude product was dissolved in THF (5 mL) and the resulting solution was added to a stirring solution of triethylamine (3.2 mL, 22.9 mmol), tosyl chloride (2.18 mg, 11.4 mmol) and THF (10 mL). The reaction mixture was stirred overnight at rt, then saturated  $\text{NaHCO}_3$  (10 mL) was added. The mixture was transferred to a separatory funnel and extracted with  $\text{CH}_2\text{Cl}_2$  (3 x 50 mL). The combined organic layers were dried over anhydrous  $\text{Na}_2\text{SO}_4$ , filtered, and concentrated. The crude product was purified by flash chromatography on silica gel to afford 2.3 g (80%) of the title compound as a colorless oil.<sup>2</sup> The product was judged to be a 1:1 mixture of diastereomers by  $^1\text{H}$  NMR analysis. Data are for

the mixture.  $[\alpha]^{23}_{\text{D}} +65.7$  (*c* 1.0,  $\text{CH}_2\text{Cl}_2$ );  $^1\text{H}$  NMR (400 MHz,  $\text{CDCl}_3$ )  $\delta$  7.82–7.73 (m, 2 H), 7.36–7.30 (m, 2 H), 7.20 (d, *J* = 8.0 Hz, 1.2 H), 7.14 (d, *J* = 8.4 Hz, 0.8 H), 6.88–6.80 (m, 2 H), 4.02–3.94 (m, 0.5 H), 3.83–3.75 (m, 3.5 H), 3.42–3.37 (m, 1 H), 3.30–3.21 (m, 1 H), 3.18–3.07 (m, 1 H), 3.03 (d, *J* = 10.4 Hz, 0.6 H), 2.83 (dd, *J* = 9.2, 13.6 Hz, 0.4 H), 2.44–2.41 (m, 3 H), 1.84–1.74 (m, 1 H), 1.64–1.54 (m, 2 H), 1.19 (m, 1 H), 1.09 (s, 2 H);  $^{13}\text{C}$  NMR (100 MHz,  $\text{CDCl}_3$ )  $\delta$  158.3, 143.7, 143.6, 133.9, 130.9, 130.6, 130.0, 129.8, 129.7, 129.6, 127.8, 127.7, 113.9, 113.7, 76.1, 76.0, 61.7, 61.6, 61.5, 61.0, 55.2, 45.5, 43.2, 41.1, 41.0, 25.4, 24.1, 21.5 (5 peaks are incidentally equivalent).

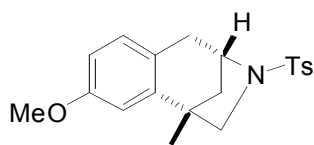

**(+)-(1*S*,4*S*)-8-Methoxy-1-methyl-3-tosyl-2,3,4,5-tetrahydro-1H-1,4-methanobenzo[*d*]azepine (13).**<sup>3</sup> A flame-dried round-bottom flask was charged with aluminum trichloride (8.0 g, 60 mmol) and  $\text{CH}_2\text{Cl}_2$  (100 mL). The flask was cooled to 0 °C and a solution of (+)-(5*S*,3*RS*)-5-(4-methoxybenzyl)-3-methyl-1-tosylpyrrolidin-3-ol (2.15 g, 5.7 mmol) in  $\text{CH}_2\text{Cl}_2$  (20 mL) was added *via* syringe. The resulting mixture was allowed to slowly warm to rt and was stirred overnight. The reaction mixture was then poured into a solution of saturated aqueous  $\text{NaHCO}_3$  (50 mL). The mixture was transferred to a separatory funnel, the layers were separated, and the aqueous layer was extracted with  $\text{CH}_2\text{Cl}_2$  (2 x 50 mL). The combined organic layers were dried over anhydrous  $\text{Na}_2\text{SO}_4$ , filtered, and concentrated. The crude product was purified by flash chromatography on silica gel to afford 1.2 g (60%) of the title compound as a pale yellow solid. The enantiomeric excess was determined to be 81% ee by chiral HPLC analysis (Chiralpak AD-H 0.46 cm x 25 cm, 1 % *i*PrOH/hexanes, 1 mL/min,  $\lambda$  = 254 nm, RT = 8.0 and 9.8 min). Spectroscopic properties were consistent with those previously reported in the literature.  $[\alpha]^{23}_{\text{D}} +16.0$  (*c* 1.0,  $\text{CH}_2\text{Cl}_2$ ) [for *ent*-**13** lit.<sup>3</sup>  $[\alpha]^{27}_{\text{D}} -16.9$  (*c* 0.89,  $\text{CHCl}_3$ )]; mp: 137–140 °C (lit.<sup>3</sup> mp 136–138 °C);  $^1\text{H}$  NMR (400 MHz,  $\text{CDCl}_3$ )  $\delta$  7.70 (d, *J* = 8.4 Hz, 2 H), 7.28 (d, *J* = 8.0 Hz, 2 H), 6.97 (d, *J* = 8.4 Hz, 1 H), 6.78 (d, *J* = 2.5 Hz, 1 H), 6.72 (dd, *J* = 2.6, 8.3 Hz, 1 H), 4.41–4.35 (m, 1 H), 3.78 (s, 3 H), 3.40 (dd, *J* = 1.2, 8.7 Hz, 1 H), 3.11 (d, *J* = 16.6 Hz, 1 H), 3.02 (d, *J* = 8.6 Hz, 1 H), 2.93 (dd, *J* = 2.8, 16.5 Hz, 1 H), 2.42 (s, 3 H), 1.79 (d, *J* = 11.5 Hz, 1 H), 1.50–1.38 (m, 4 H).

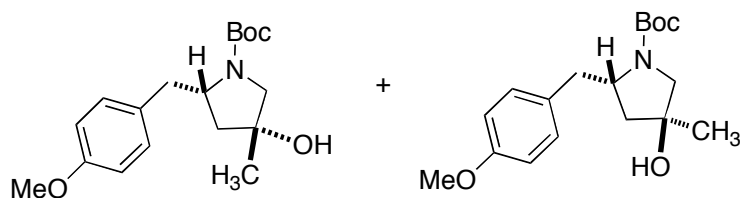

**(+)-(2*S*,4*RS*)-*tert*-Butyl 4-hydroxy-2-(4-methoxybenzyl)-4-methylpyrrolidine-1-carboxylate (14a-b).** A round-bottom flask was charged with (+)-(2*S*,4*RS*)-*tert*-butyl 2-(4-methoxybenzyl)-4-methyl-4-[(trimethylsilyl)oxy]pyrrolidine-1-carboxylate (100 mg, 0.254 mmol) and tetrabutylammonium fluoride (0.51 mL, 0.51 mmol) 1 M solution in THF) and the resulting solution was stirred until the starting material had been consumed as judged by TLC analysis (ca. 1 h). The reaction mixture was diluted with water (5 mL) and CH<sub>2</sub>Cl<sub>2</sub> (5 mL) then was transferred to a separatory funnel. The layers were separated, and the aqueous layer was extracted with CH<sub>2</sub>Cl<sub>2</sub> (3 x 5 mL). The combined organic layers were dried over anhydrous Na<sub>2</sub>SO<sub>4</sub> and concentrated. The crude product was purified by flash chromatography on silica gel to afford 73 mg (90%) of the title compound as a colorless viscous oil. The product was judged to be a 1:1 mixture of rotamers and a 1:1 mixture of diastereomers by <sup>1</sup>H NMR analysis. Data are for the mixture.  $[\alpha]_D^{23} +23.0$  (*c* 1.0, CH<sub>2</sub>Cl<sub>2</sub>); <sup>1</sup>H NMR (400 MHz, CDCl<sub>3</sub>) δ 7.18–7.02 (m, 2 H), 6.84–6.78 (m, 2 H), 4.24–3.88 (m, 1 H), 3.79 (s, 3 H), 3.70–3.08 (m, 2.5 H), 3.00–2.60 (m, 1.5 H), 1.96–1.70 (m, 2 H), 1.51 (s, 9 H), 1.38–1.24 (m, 3 H); <sup>13</sup>C NMR (100 MHz, CDCl<sub>3</sub>) δ 157.9, 155.1, 154.6, 131.1, 130.4, 130.1, 113.7, 79.4, 77.2, 76.1, 75.7, 75.2, 59.9, 59.5, 59.3, 58.2, 57.7, 55.0, 45.1, 44.5, 43.0, 42.5, 39.7, 39.5, 38.5, 38.1, 28.5, 26.7, 24.7; IR (film) 3420, 1682 cm<sup>-1</sup>; MS (ESI): 344.1833 (344.1838 calcd for C<sub>18</sub>H<sub>27</sub>NO<sub>4</sub>, M + Na<sup>+</sup>).

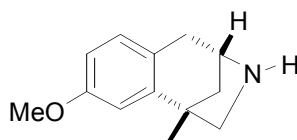

**(+)-(1*S*,4*S*)-8-Methoxy-1-methyl-2,3,4,5-tetrahydro-1*H*-1,4-methanobenzo[*d*]azepine (S1).** A flame-dried round-bottom flask was charged with (+)-(1*S*,4*S*)-8-methoxy-1-methyl-3-tosyl-2,3,4,5-tetrahydro-1*H*-1,4-methanobenzo[*d*]azepine (1.1 g, 3.1 mmol) and xylene (15 mL). A solution of Red-Al was added (3.5 M in toluene, 3.3 mL, 11.4 mmol) and the mixture was heated to reflux for 1 h. The solution was cooled to 0 °C, diluted with ether and quenched with a few drops of water. The solution was filtered through a pad of celite and concentrated *in vacuo*. The

crude product was purified by flash chromatography on silica gel to afford 450 mg (71%) of the title compound as a yellow oil.  $[\alpha]_D^{23} +38.2$  ( $c$  1.0,  $\text{CH}_2\text{Cl}_2$ );  $^1\text{H NMR}$  (500 MHz,  $\text{CDCl}_3$ )  $\delta$  7.02 (d,  $J = 8.5$  Hz, 1 H), 6.82 (d,  $J = 2.5$  Hz, 1 H), 6.71 (dd,  $J = 3.0, 8.5$  Hz, 1 H), 3.85–3.79 (m, 4 H), 3.11–3.02 (m, 2 H), 2.92 (d,  $J = 10$  Hz, 1 H), 2.78 (m, 2 H), 1.96–1.92 (m, 1 H), 1.86 (d,  $J = 11$  Hz, 1 H), 1.49 (s, 3 H).

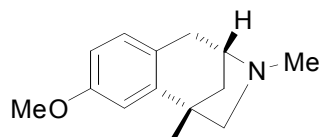

**(-)-8-*O*-methylaphanorphine (15).** A flame-dried round-bottom flask was charged with (+)-(1*S*,4*S*)-8-methoxy-1-methyl-2,3,4,5-tetrahydro-1*H*-1,4-methanobenzo[*d*]azepine (300 mg, 1.5 mmol), a solution of 37% aqueous formalin (1.8 mL) and formic acid (2.8 mL). The reaction mixture was heated to 100 °C for 1.5 h, then cooled to rt, diluted with water (10 mL), and basified with 10% NaOH solution. The mixture was transferred to a separatory funnel and extracted with  $\text{CH}_2\text{Cl}_2$  (3 x 20 mL). The combined organic layers were dried over anhydrous  $\text{Na}_2\text{SO}_4$ , filtered, and concentrated *in vacuo*. The crude product was purified by flash chromatography on silica gel to afford 294 mg (90%) of the title compound as a pale yellow oil. Spectroscopic properties are consistent with those previously reported in the literature.  $[\alpha]_D^{23} -5.8$  ( $c$  1.0,  $\text{CHCl}_3$ ), [lit.<sup>4</sup>  $[\alpha]_D^{27} -7.4$  ( $c$  0.35,  $\text{CHCl}_3$ )];  $^1\text{H NMR}$  (400 MHz,  $\text{CDCl}_3$ )  $\delta$  7.02 (d,  $J = 8.4$  Hz, 1 H), 6.78 (d,  $J = 2.8$  Hz, 1 H), 6.68 (dd,  $J = 2.8, 8.4$  Hz, 1 H), 3.78 (s, 3 H), 3.42 (m, 1 H), 3.02 (d,  $J = 16.4$  Hz, 1 H), 2.88–2.84 (m, 2 H), 2.82 (d,  $J = 1.2$  Hz, 1 H), 2.76 (d,  $J = 9.2$  Hz, 1 H), 2.48 (s, 3 H), 2.02 (ddd,  $J = 1.2, 5.6, 10.8$  Hz, 1 H), 1.48 (s, 3 H).

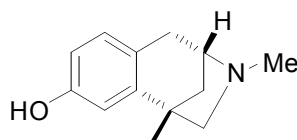

**(+)-aphanorphine (16).** Demethylation of (-)-8-*O*-methylaphanorphine was carried according to reported procedure.<sup>5</sup> A flame-dried round-bottom flask was charged with **15** (40 mg, 0.18 mmol) and  $\text{CH}_2\text{Cl}_2$  (1 mL) and cooled to -30 °C.  $\text{BBr}_3$  (1.0 M in  $\text{CH}_2\text{Cl}_2$ , 0.36 mL) was added slowly dropwise. The reaction mixture was stirred for 30 min at -30 °C, 30 min at -20 °C, 30 min at -10 °C and then 30 min at 0 °C. The reaction was quenched at 0 °C with aqueous  $\text{NaHCO}_3$  and

extracted with CH<sub>2</sub>Cl<sub>2</sub> (3 x 5 mL). The combined organic layers were dried over anhydrous Na<sub>2</sub>SO<sub>4</sub>, filtered and concentrated *in vacuo*. The resulting residue was taken up in 2 mL of 3 M NaOH and heated at 100 °C for 5 min. The solution was acidified with 1 M HCl and basified with saturated aqueous NaHCO<sub>3</sub>. The aqueous layer was extracted with CH<sub>2</sub>Cl<sub>2</sub> (3 x 10 mL), dried over anhydrous Na<sub>2</sub>SO<sub>4</sub>, filtered and concentrated *in vacuo*. The crude solid was triturated with acetone to afford 23 mg (63%) of the title compound as a white solid. Spectroscopic properties are consistent with the present literature.  $[\alpha]_{\text{D}}^{23} +28.0$  (*c* 0.1, MeOH) [lit.<sup>4</sup>  $[\alpha]_{\text{D}}^{27} +37.5$  (*c* 0.16, MeOH)]; mp 202–208 °C (lit.<sup>4</sup> mp 215–222). <sup>1</sup>H NMR (400 MHz, CD<sub>3</sub>OD) δ 6.89 (d, *J* = 8 Hz, 1 H), δ 6.67 (d, *J* = 2.4 Hz, 1 H), δ 6.56 (dd, *J* = 2.4, 8.4 Hz, 1 H), 3.38 (m, 1 H), 2.97 (d, *J* = 16.8 Hz, 1 H), 2.85 (m, 2 H), 2.63 (d, *J* = 9.6 Hz, 1 H), 2.40 (s, 3 H), 2.01 (q, *J* = 5.6 Hz, 1 H), 1.83 (d, *J* = 11.2 Hz, 1 H), 1.44 (s, 3 H); <sup>13</sup>C NMR (100 MHz, CD<sub>3</sub>OD) δ 156.6, 148.6, 131.2, 125.2, 114.5, 110.9, 72.7, 63.4, 44.3, 42.8, 42.1, 36.7, 21.7.

## References

- <sup>1</sup> Nagafuji, P.; Cushman, M. *J. Org. Chem.* **1996**, *61*, 4999.
- <sup>2</sup> Ma, Z.; Hu, H.; Xiong, W.; Zhai, H. *Tetrahedron* **2007**, *63*, 7523.
- <sup>3</sup> For *ent*-**13**, see: Yang, X.; Zhai, H.; Li, Z. *Org. Lett.* **2008**, *10*, 2457.
- <sup>4</sup> Takano, S.; Inomata, K.; Sato, T.; Ogasawara, K. *J. Chem. Soc., Chem. Commun.* **1989**, 1591.
- <sup>5</sup> Fuchs, J. R.; Funk, R. L. *Org. Lett.* **2001**, *3*, 3923.



VARIAN 

Sample Name:  
BRR-II-102-A  
Data Collected on:  
Ga.Chem.LSA.UMich.edu-vnmrs400  
Archive directory:

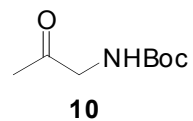

Sample directory:

FidFile: BRR-II-102-A

Pulse Sequence: PROTON (s2pul)  
Solvent: cdcl3  
Data collected on: Nov 26 2010

Temp. 23.0 C / 296.1 K  
Operator: branrose

Relax. delay 0.500 sec  
Pulse 45.0 degrees  
Acq. time 3.500 sec  
Width 6410.3 Hz  
10 repetitions  
OBSERVE H1, 399.5389191 MHz  
DATA PROCESSING  
Line broadening 0.3 Hz  
FT size 65536  
Total time 0 min 48 sec

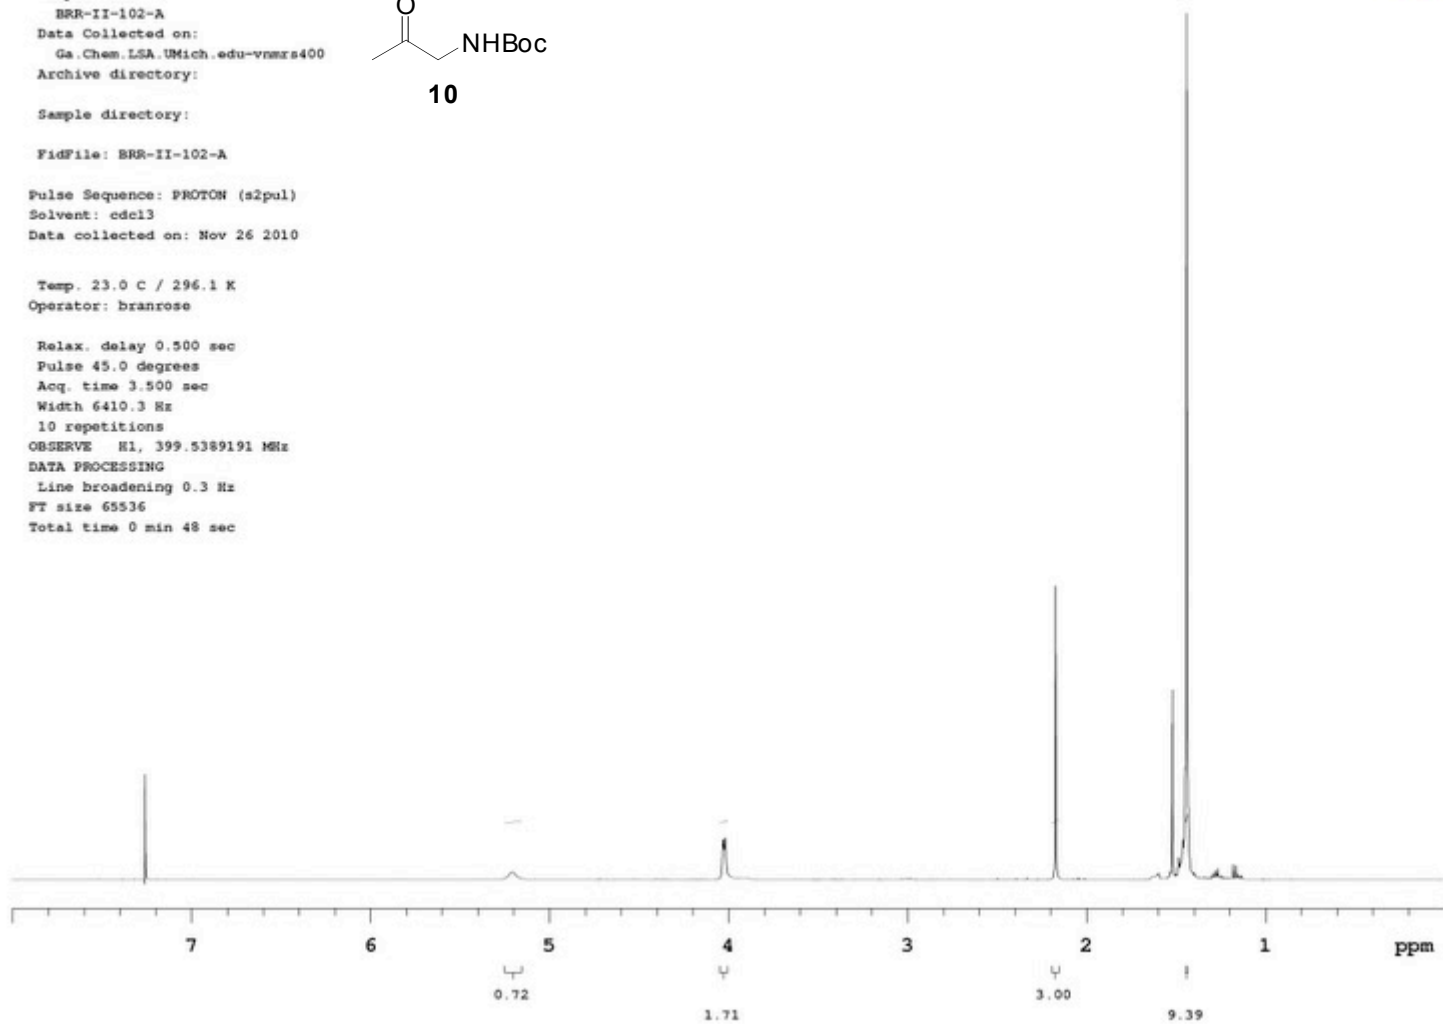

Standard Proton

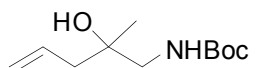VARIAN 

Sample Name:

Archive directory:

Sample directory:

FidFile: Mai-3-58

Pulse Sequence: Proton (s2pul)

Solvent: cdc13

Data collected on: Jun 24 2008

Operator: dmai

INOVA-500 "Sn.Chem.LSA.UMich.edu"

Relax. delay 0.100 sec

Pulse 45.0 degrees

Acq. time 3.000 sec

Width 8003.2 Hz

16 repetitions

OBSERVE H1, 499.9042537 MHz

DATA PROCESSING

Line broadening 0.2 Hz

FT size 65536

Total time 0 min 56 sec

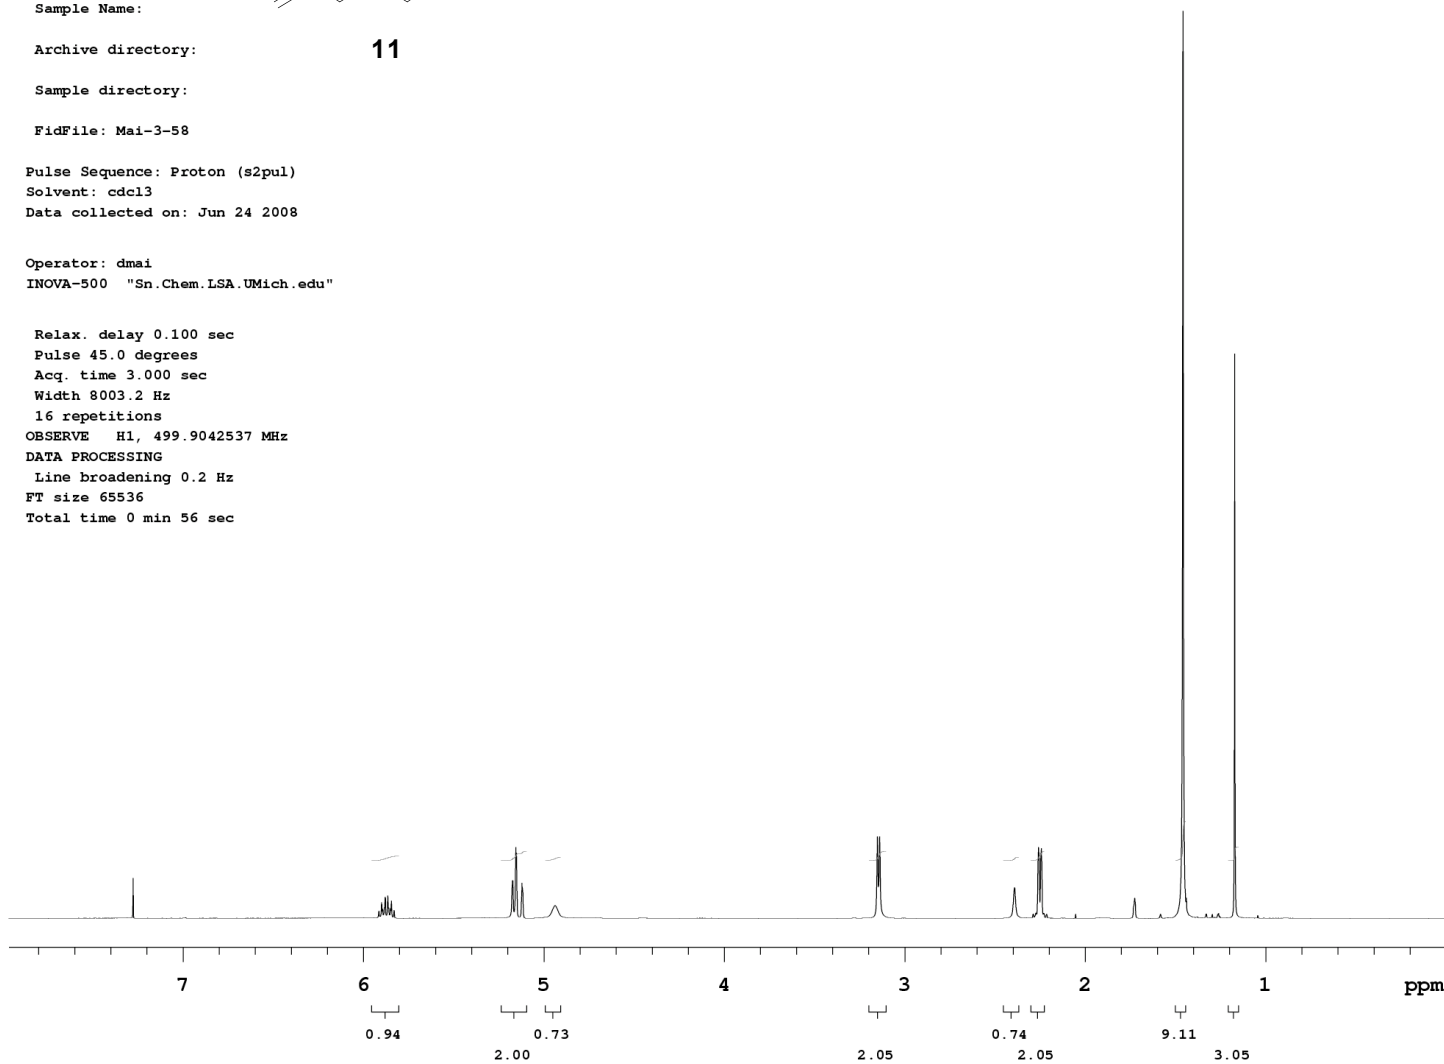

Mai-3-58-CARBON

Sample Name:

Data Collected on:  
Sn.Chem.LSA.UMich.edu-inova500  
Archive directory:

Sample directory:

FidFile: Mai-3-58-CARBON

Pulse Sequence: CARBON (s2pul)

Solvent: cdcl3

Data collected on: Aug 6 2010

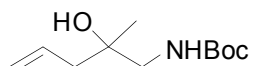

11

VARIAN 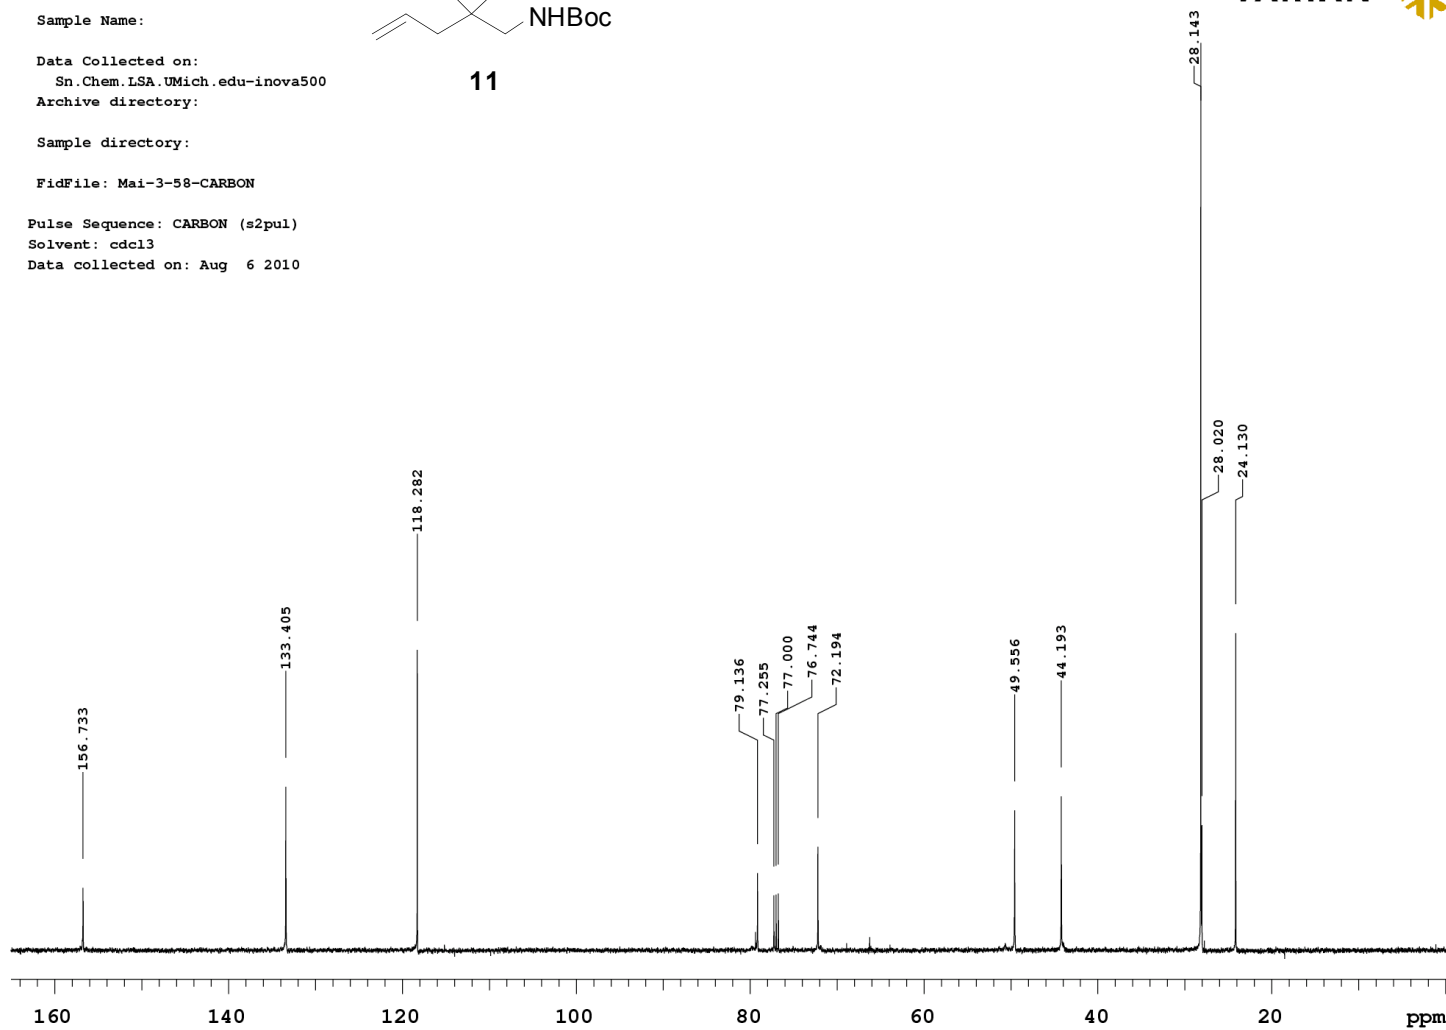

Sample Name:  
BRR-II-104-A  
Data Collected on:  
Ga.Chem.LSA.UMich.edu-vnmrs400  
Archive directory:

Sample directory:

FidFile: BRR-II-104-A

Pulse Sequence: PROTON (s2pul)  
Solvent: cdcl3  
Data collected on: Dec 2 2010

Operator: branrose

Relax. delay 0.500 sec  
Pulse 45.0 degrees  
Acq. time 3.500 sec  
Width 6410.3 Hz  
12 repetitions  
OBSERVE H1, 399.5389193 MHz  
DATA PROCESSING  
Line broadening 0.3 Hz  
FT size 65536  
Total time 0 min 56 sec

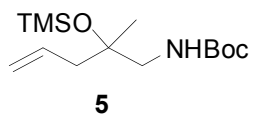

VARIAN 

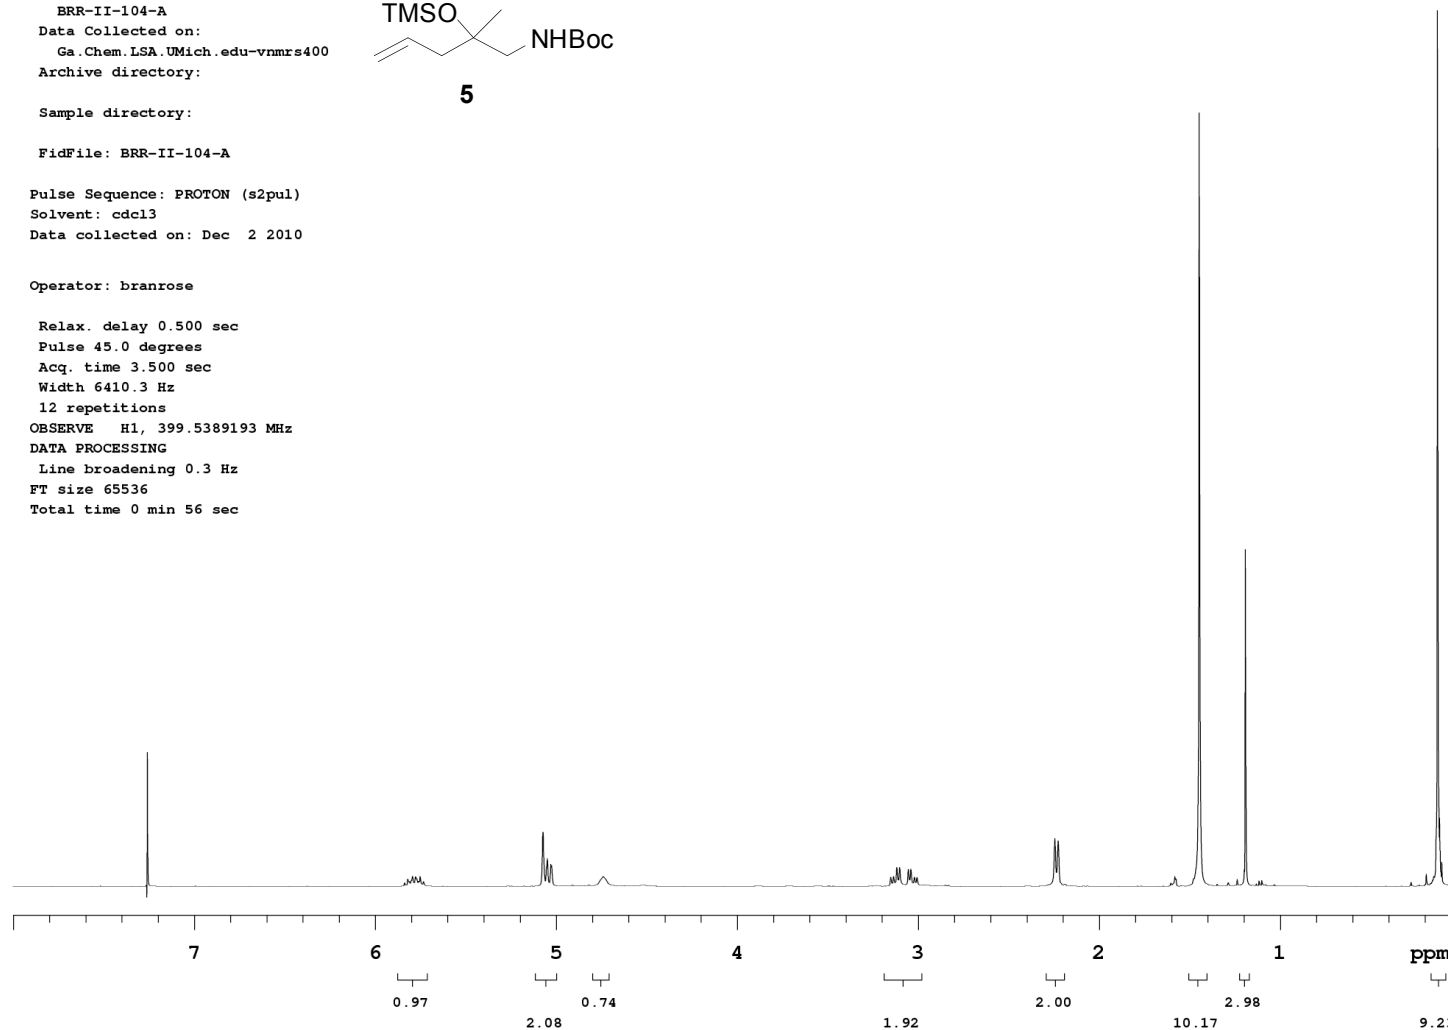

TMS Substrate CARBON

Sample Name:

Data Collected on:

Ga.Chem.LSA.UMich.edu-vmsrs400

Archive directory:

Sample directory:

FidFile: Mai-TMS-substrate

Pulse Sequence: CARBON (s2pul)

Solvent: cdcl3

Data collected on: Jan 27 2011

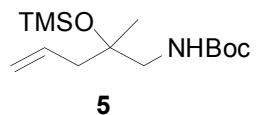VARIAN 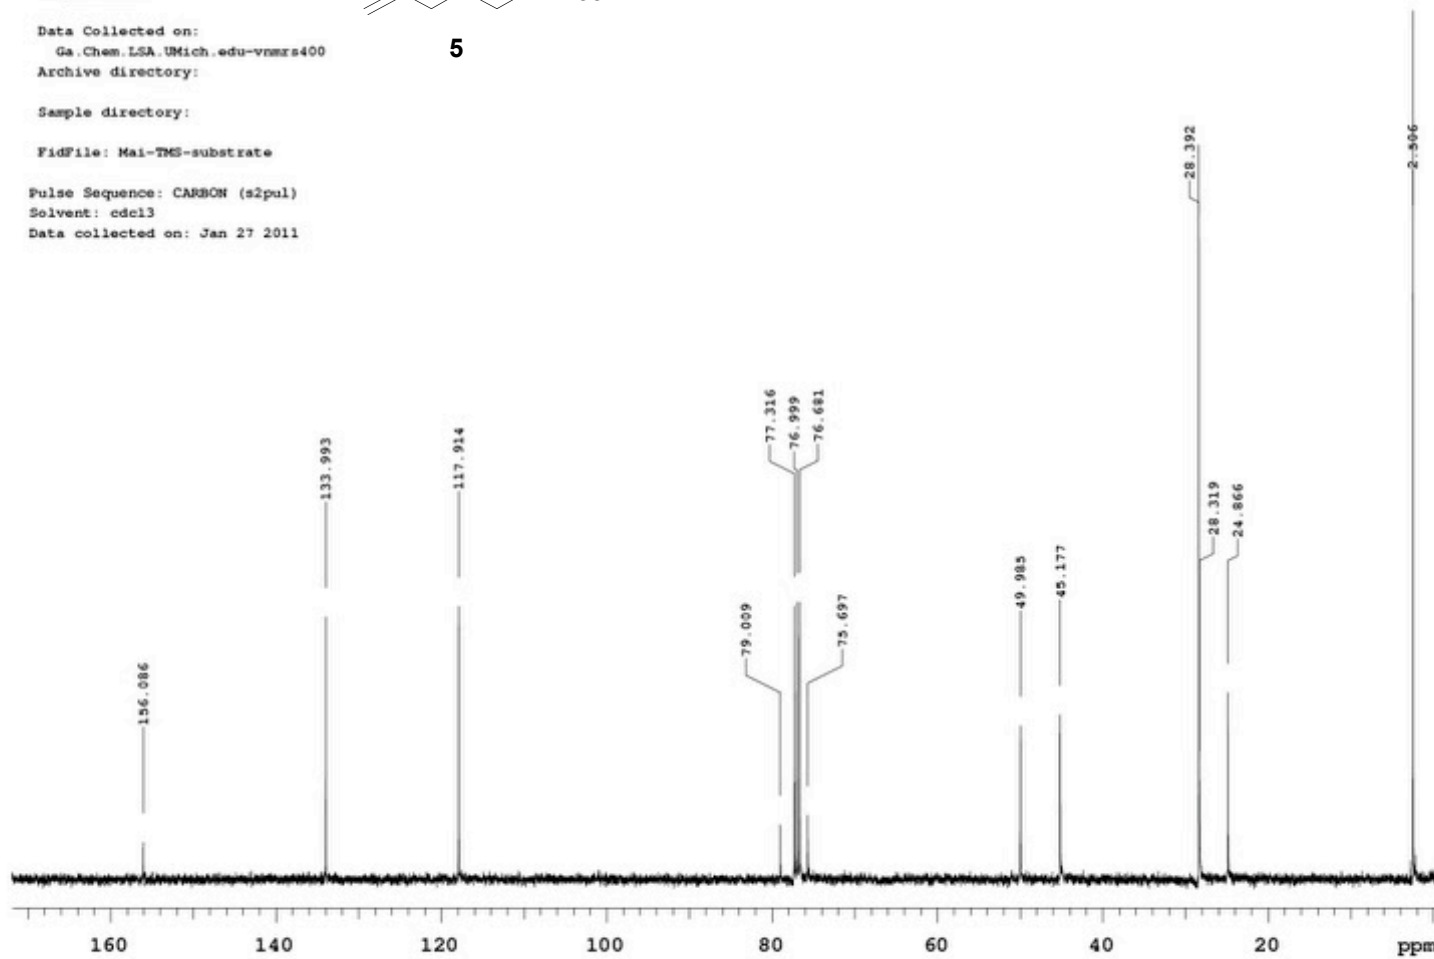

Sample Name:  
BRR-II-29  
Data Collected on:  
Ga.Chem.LSA.UMich.edu-vnmrs400  
Archive directory:  
Sample directory:  
FidFile: BRR-II-33-1H  
Pulse Sequence: PROTON (s2pul)  
Solvent: cdcl3  
Data collected on: Apr 13 2010

Operator: branrose

Relax. delay 0.500 sec  
Pulse 45.0 degrees  
Acq. time 3.500 sec  
Width 6410.3 Hz  
12 repetitions  
OBSERVE H1, 399.5389238 MHz  
DATA PROCESSING  
Line broadening 0.3 Hz  
FT size 65536  
Total time 0 min 56 sec

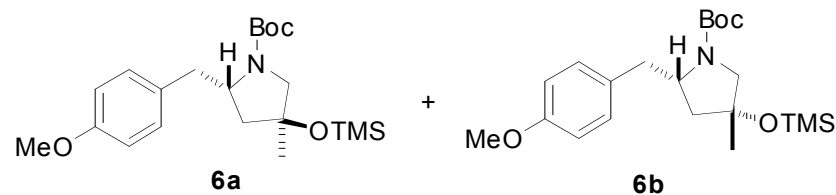

VARIAN 

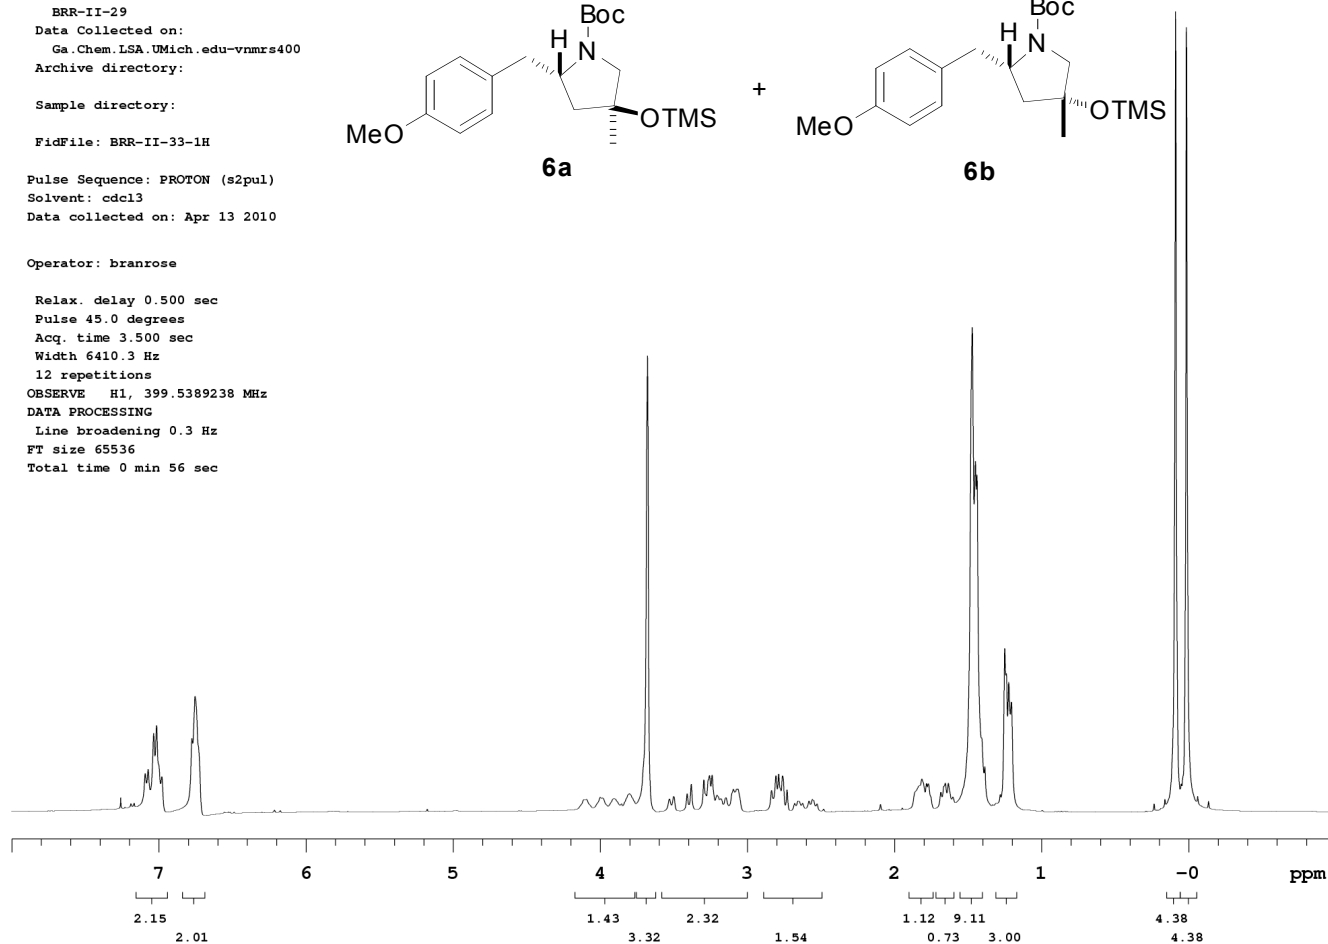

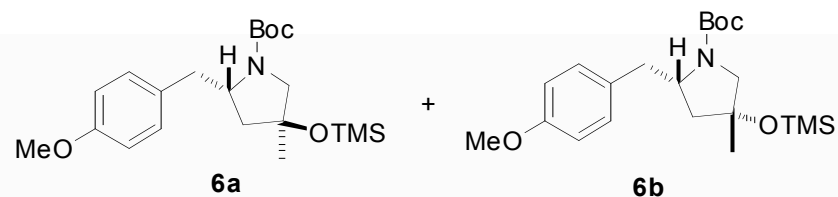

VARIAN 

STANDARD PROTON PARAMETERS

Sample Name:

Data Collected on:

Ga.Chem.LSA.UMich.edu-vnmrs400

Archive directory:

Sample directory:

FidFile: BRR-II-29-13C

Pulse Sequence: CARBON (s2pul)

Solvent: cdcl3

Data collected on: Apr 13 2010

Operator: branrose

Relax. delay 0.100 sec

Pulse 45.0 degrees

Acq. time 2.569 sec

Width 25510.2 Hz

208 repetitions

OBSERVE C13, 100.4641654 MHz

DECOUPLE H1, 399.5409236 MHz

Power 35 dB

continuously on

WALTZ-16 modulated

DATA PROCESSING

Line broadening 1.0 Hz

FT size 131072

Total time 9 min 17 sec

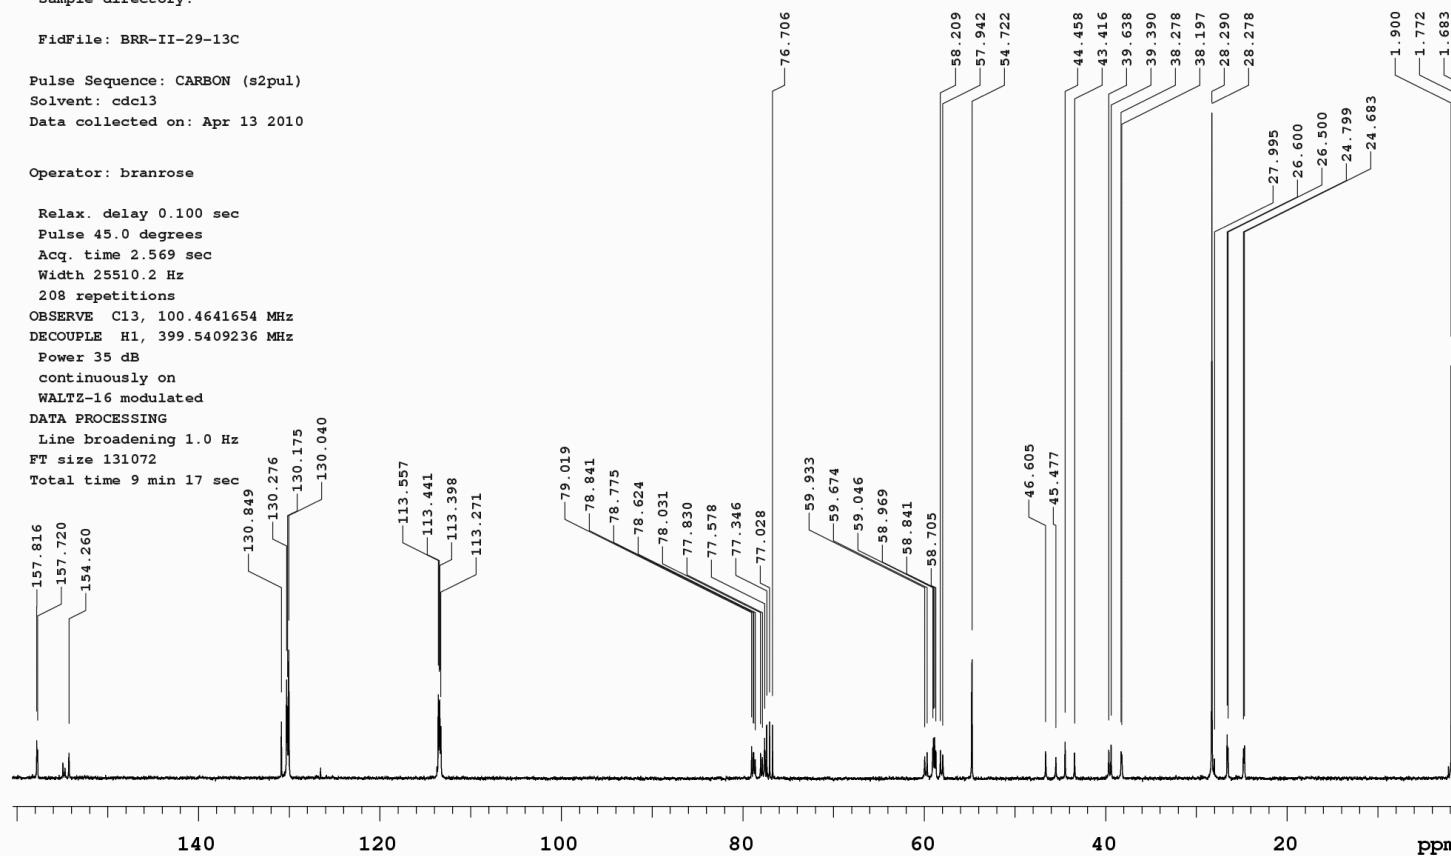

Mai-8-103

Sample Name:

Data Collected on:

Ga.Chem.LSA.UMich.edu-vnmrs400

Archive directory:

Sample directory:

FidFile: Mai-8-103

Pulse Sequence: PROTON (s2pul)

Solvent: cdcl3

Data collected on: Jan 5 2011

Operator: dmai

Relax. delay 0.500 sec

Pulse 45.0 degrees

Acq. time 3.500 sec

Width 6410.3 Hz

16 repetitions

OBSERVE H1, 399.5389200 MHz

DATA PROCESSING

Line broadening 0.3 Hz

FT size 65536

Total time 1 min 12 sec

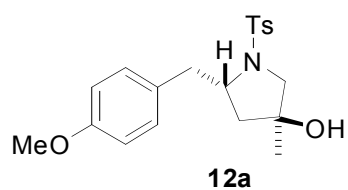

+

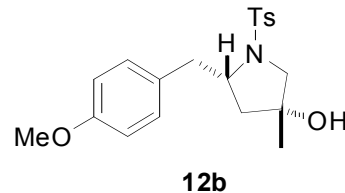

VARIAN 

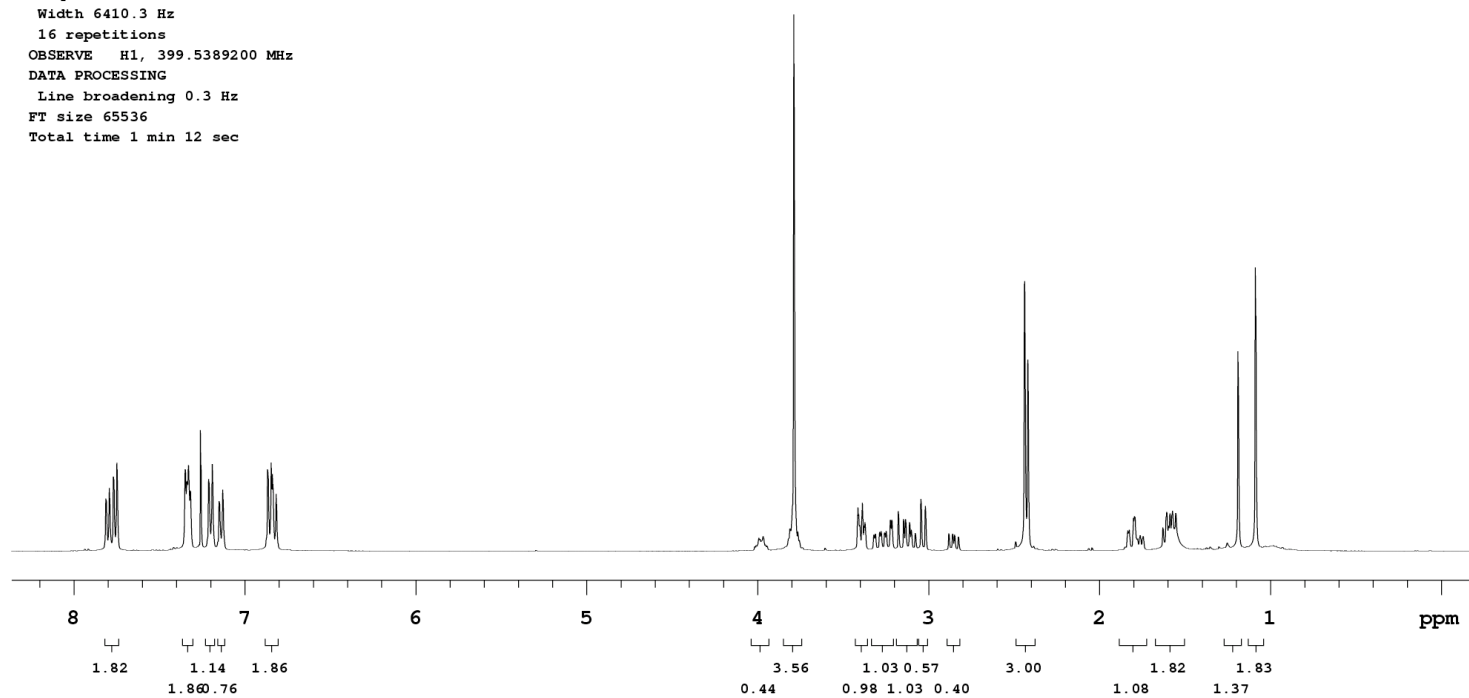



Mai-8-103

Sample Name:

Data Collected on:  
Ga.Chem.LSA.UMich.edu-vnmrs400

Archive directory:

Sample directory:

FidFile: Mai-8-103-CARBON

Pulse Sequence: CARBON (s2pul)

Solvent: cdcl3

Data collected on: Jan 5 2011

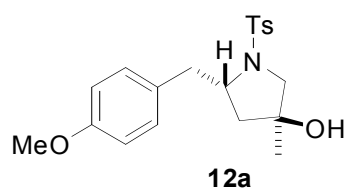

+

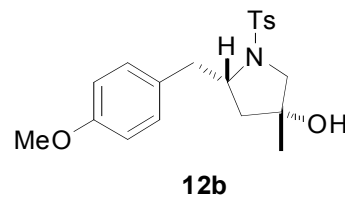VARIAN 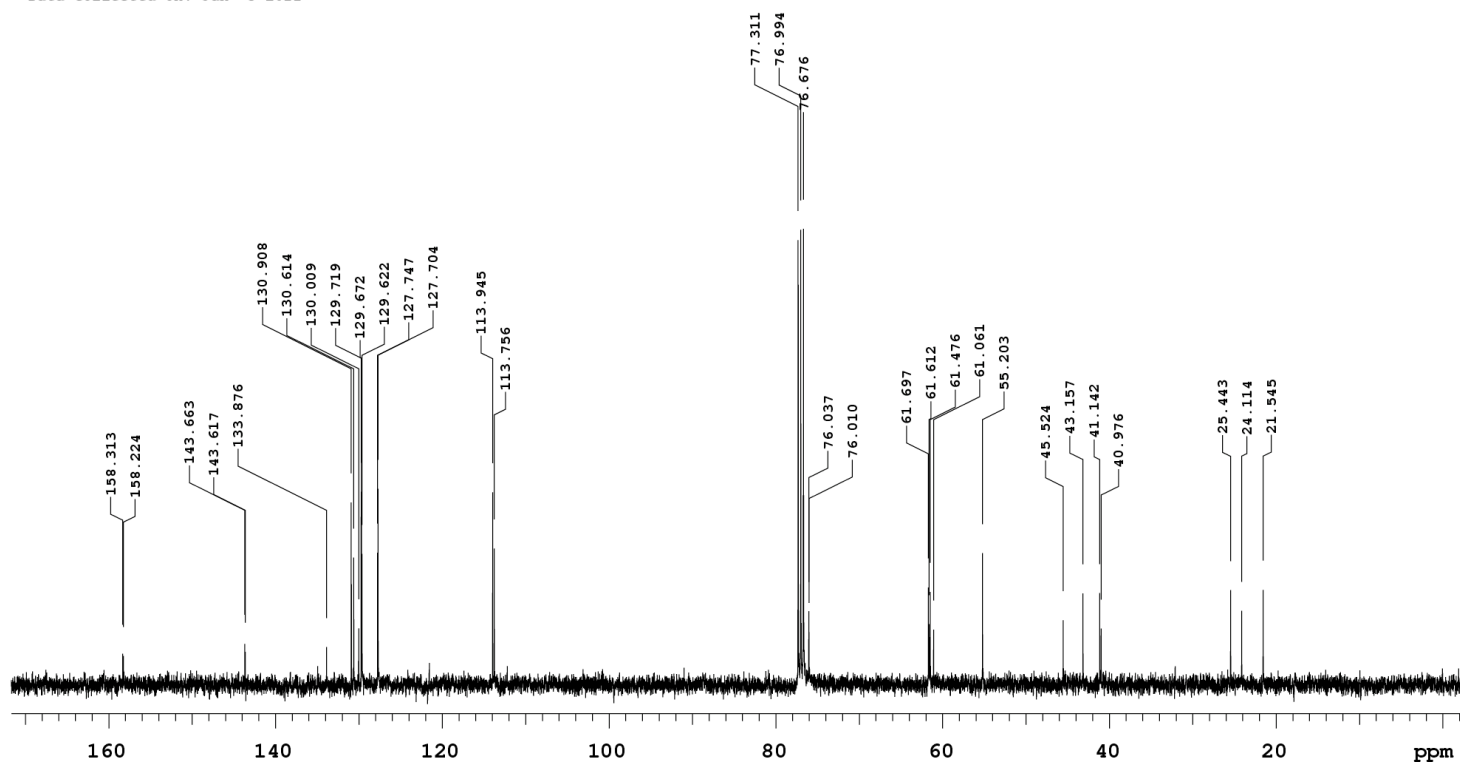

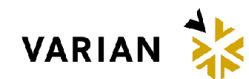

Sample Name:  
BRR-II-111-A  
Data Collected on:  
Ga.Chem.LSA.UMich.edu-vmrs400  
Archive directory:

Sample directory:

FidFile: BRR-II-111-A

Pulse Sequence: PROTON (s2pul)  
Solvent: cdcl3  
Data collected on: Jan 18 2011

Operator: branrose

Relax. delay 0.500 sec  
Pulse 45.0 degrees  
Acq. time 3.500 sec  
Width 6410.3 Hz  
8 repetitions  
OBSERVE H1, 399.5389191 MHz  
DATA PROCESSING  
Line broadening 0.3 Hz  
FT size 65536  
Total time 0 min 40 sec

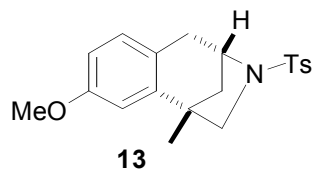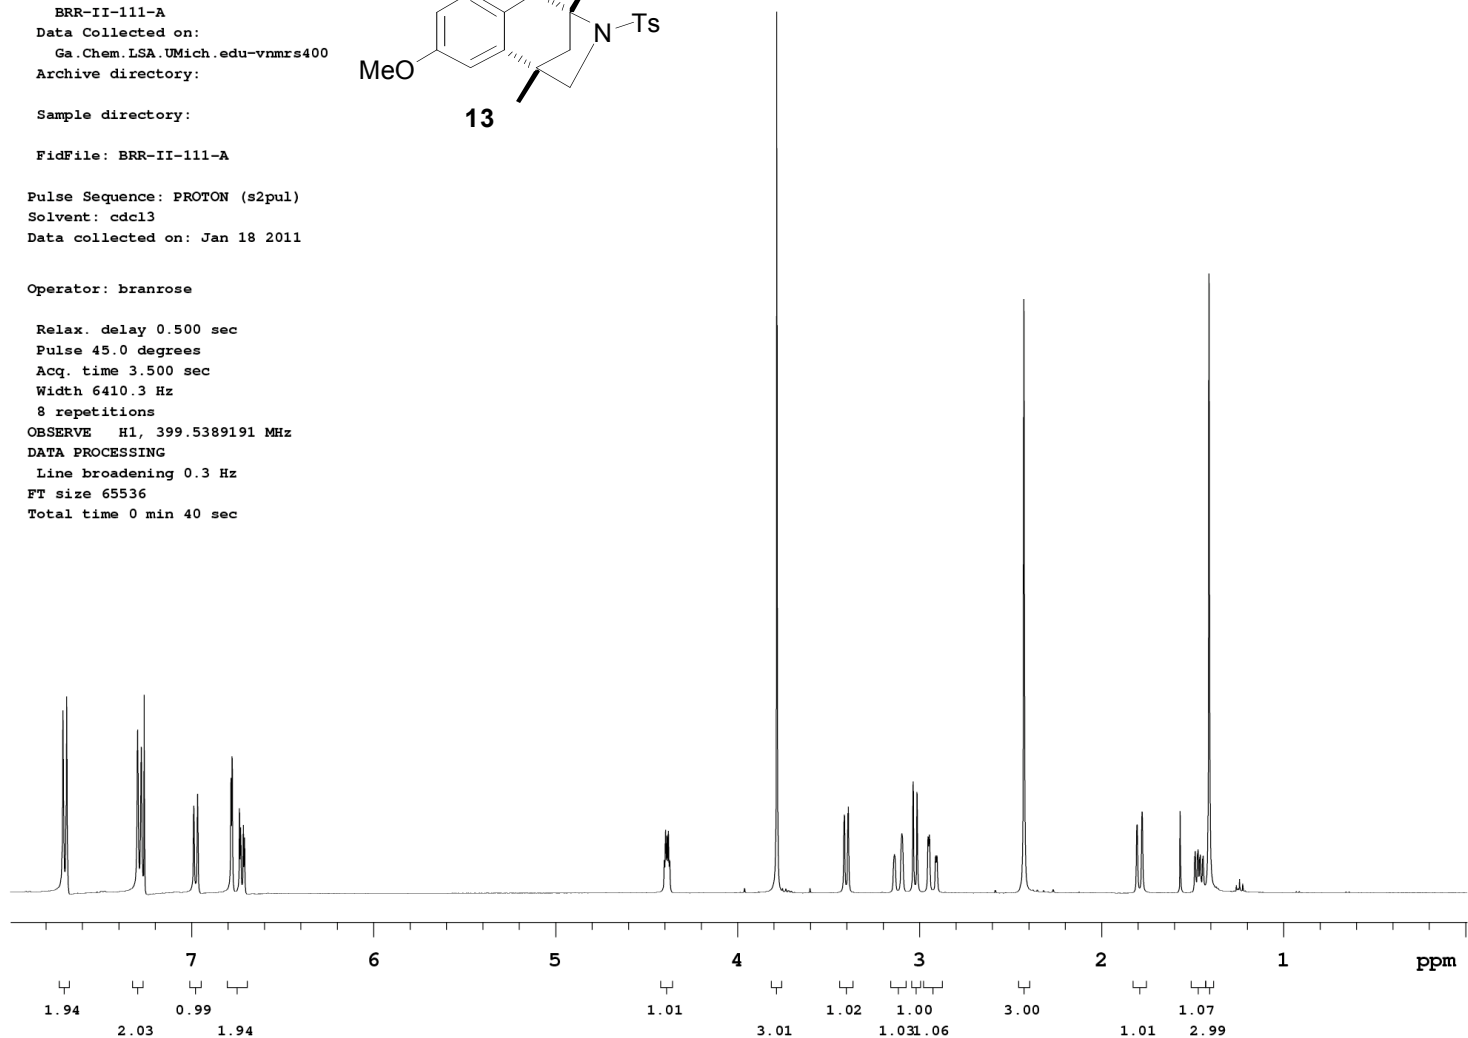

C:\CLASS-VP\Enterprise\Projects\Default\Data\Mai\HPLC\Aphanorphine\RAC-Mai-3-54-ADH-25%IPA\_1.0mL\_min.dat

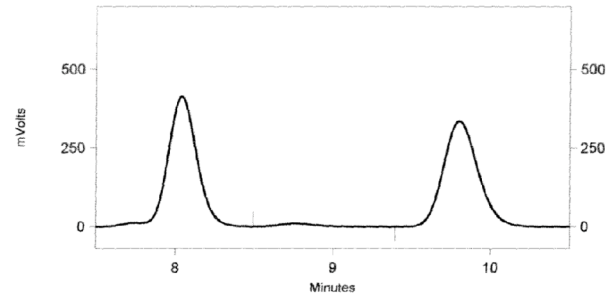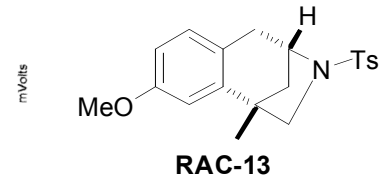

SPD-10Avp Ch2-254nm  
Results

| Retention Time | Area            | Area Percent   |
|----------------|-----------------|----------------|
| 8.042          | 5347671         | 50.752         |
| 9.800          | 5189148         | 49.248         |
| <b>Totals</b>  | <b>10536819</b> | <b>100.000</b> |

C:\CLASS-VP\Enterprise\Projects\Default\Data\Mai\HPLC\Aphanorphine\CHIRAL-Mai-4-201-ADH-25%IPA\_1.0mL\_min.dat

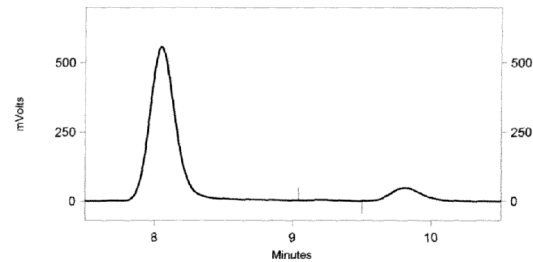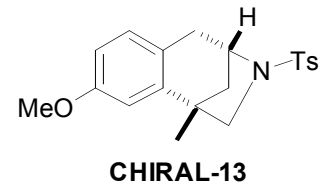

SPD-10Avp Ch2-254nm  
Results

| Retention Time | Area           | Area Percent   |
|----------------|----------------|----------------|
| 8.050          | 7382399        | 90.574         |
| 9.808          | 768262         | 9.426          |
| <b>Totals</b>  | <b>8150661</b> | <b>100.000</b> |

STANDARD 1H OBSERVE - profile

Sample Name:  
BRR-II-65-1H  
Data Collected on:  
Co.Chem.LSA.UMich.edu-vnmrs400  
Archive directory:

Sample directory:

FidFile: BRR-II-65-1H

Pulse Sequence: PROTON (s2pul)  
Solvent: cdcl3  
Data collected on: May 11 2010

Operator: branrose

Relax. delay 0.500 sec  
Pulse 45.0 degrees  
Acq. time 3.500 sec  
Width 6410.3 Hz  
12 repetitions  
OBSERVE H1, 400.5206314 MHz  
DATA PROCESSING  
Line broadening 0.3 Hz  
FT size 65536  
Total time 0 min 56 sec

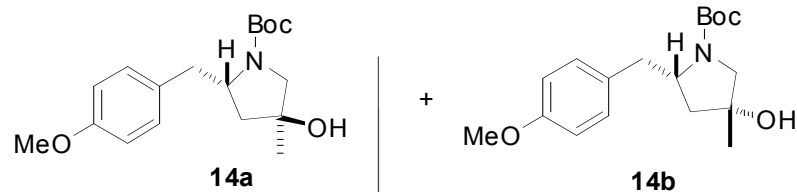

VARIAN 

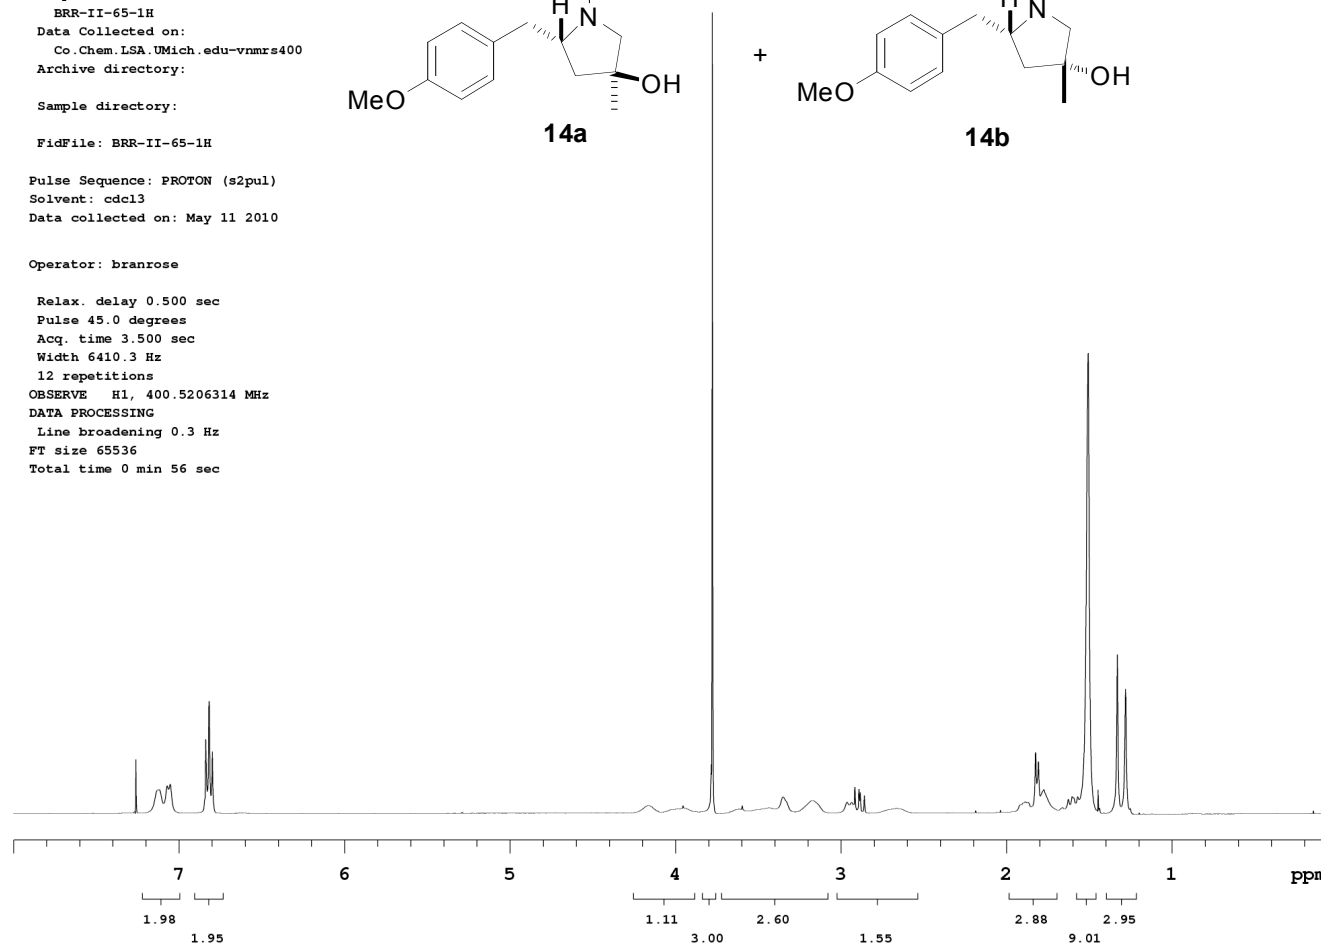

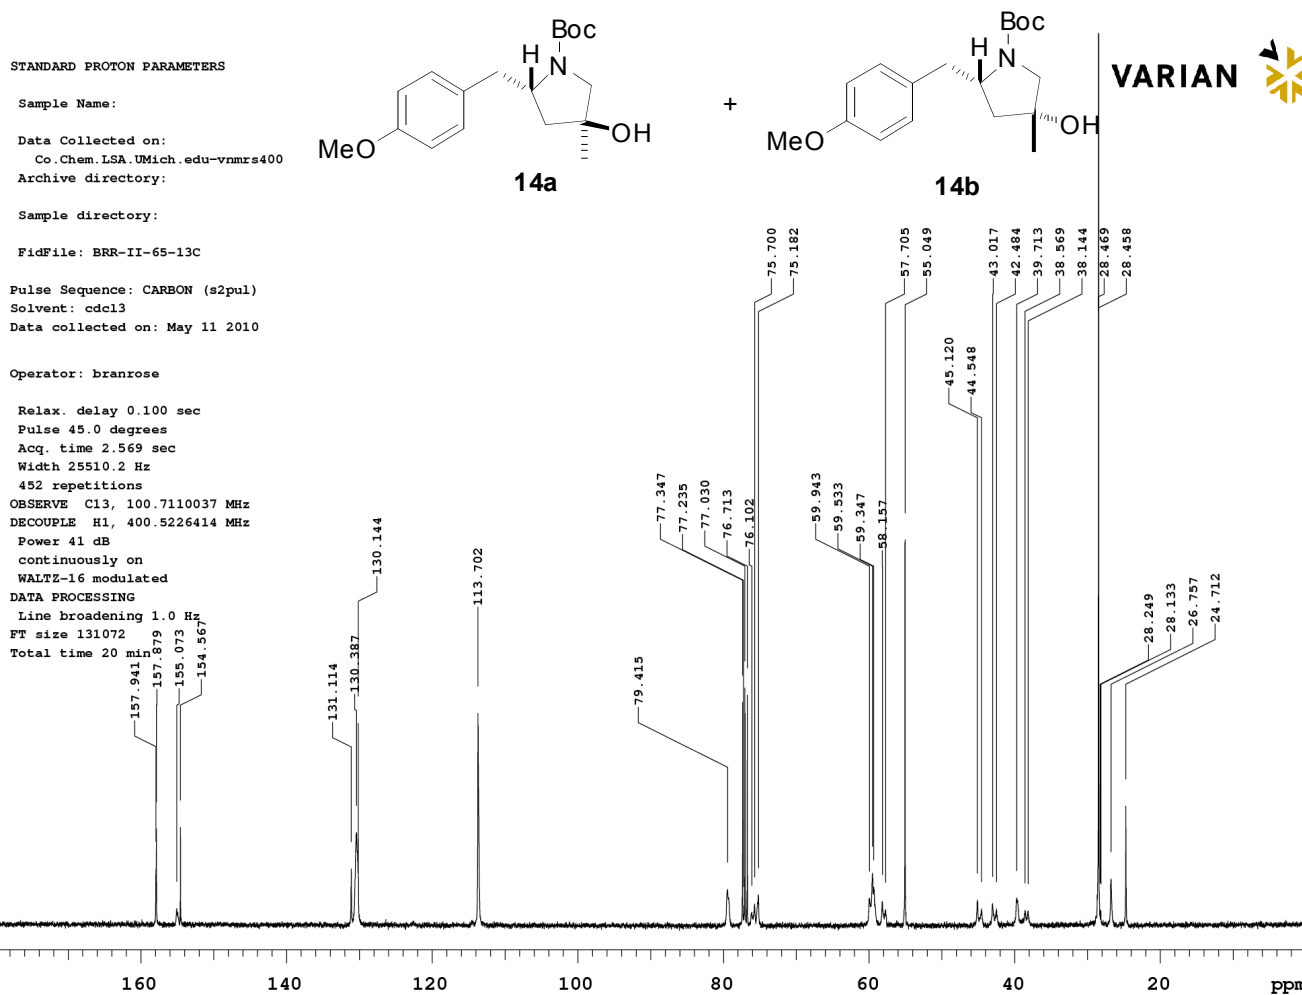

Mai-8-109-FreeAmine

Sample Name:

Data Collected on:  
Sn.Chem.LSA.UMich.edu-inova500

Archive directory:

Sample directory:

FidFile: Mai-8-109-FreeAmine

Pulse Sequence: PROTON (s2pul)  
Solvent: cdcl3  
Data collected on: Nov 24 2010

Operator: dmai

Relax. delay 0.500 sec  
Pulse 45.0 degrees  
Acq. time 3.500 sec  
Width 7998.4 Hz  
16 repetitions  
OBSERVE H1, 499.9042608 MHz  
DATA PROCESSING  
Line broadening 0.3 Hz  
FT size 65536  
Total time 1 min 12 sec

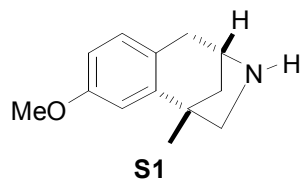

VARIAN 

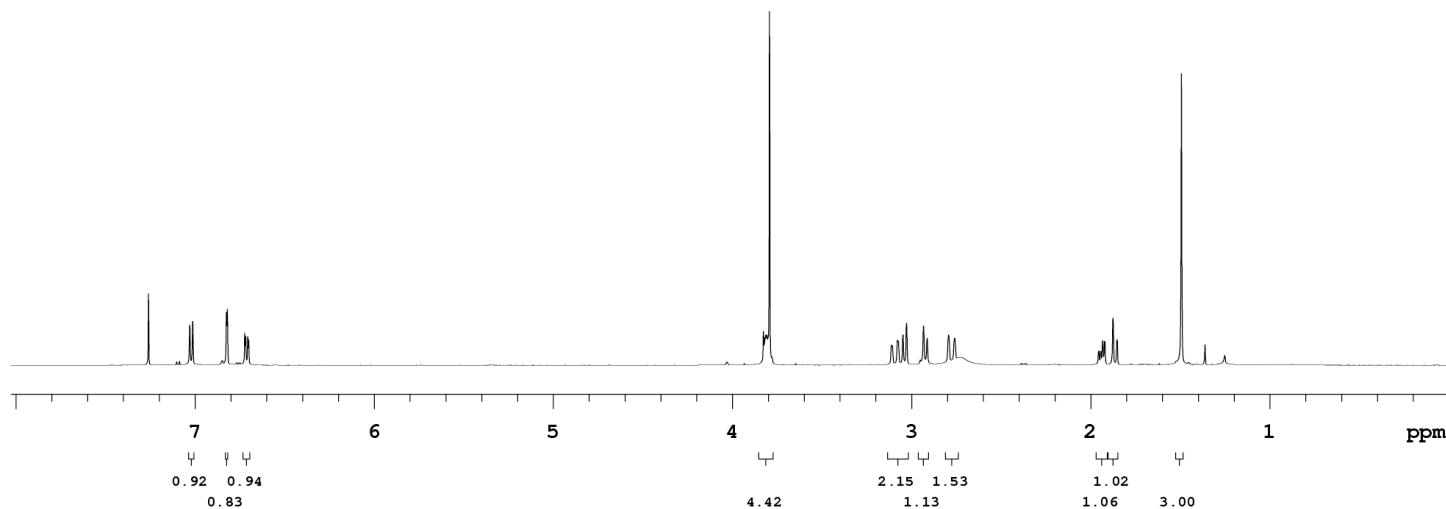

Mai-8-21

Sample Name:

Data Collected on:

Zr.Chem.LSA.UMich.edu-inova400

Archive directory:

/export/home/chempack/vnmrsys/data

Sample directory:

FidFile: Mai-8-21

Pulse Sequence: PROTON (s2pul)

Solvent: cdcl3

Data collected on: Sep 20 2010

Temp. 25.0 C / 298.1 K

Operator: dmai

Relax. delay 0.500 sec

Pulse 45.0 degrees

Acq. time 3.500 sec

Width 6399.5 Hz

16 repetitions

OBSERVE H1, 399.9649486 MHz

DATA PROCESSING

Line broadening 0.3 Hz

FT size 65536

Total time 1 min 12 sec

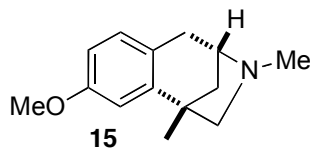

VARIAN 

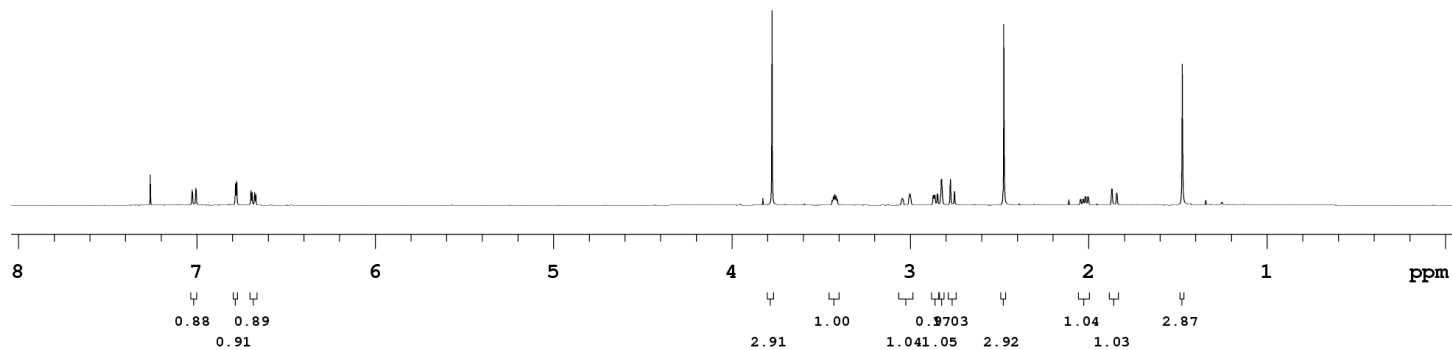

Mai-8-143-CD3OD

Sample Name:

Data Collected on:  
Ga.Chem.LSA.UMich.edu-vnmrs400  
Archive directory:

Sample directory:

FidFile: Mai-8-143-CD3OD

Pulse Sequence: PROTON (s2pul)  
Solvent: cd3od  
Data collected on: Jan 21 2011

Operator: dmai

Relax. delay 0.500 sec  
Pulse 45.0 degrees  
Acq. time 3.500 sec  
Width 6410.3 Hz  
16 repetitions  
OBSERVE H1, 399.5404952 MHz  
DATA PROCESSING  
Line broadening 0.3 Hz  
FT size 65536  
Total time 1 min 12 sec

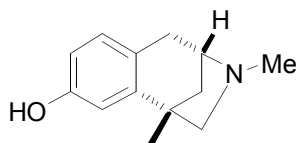

(+)-aphanorphine

VARIAN 

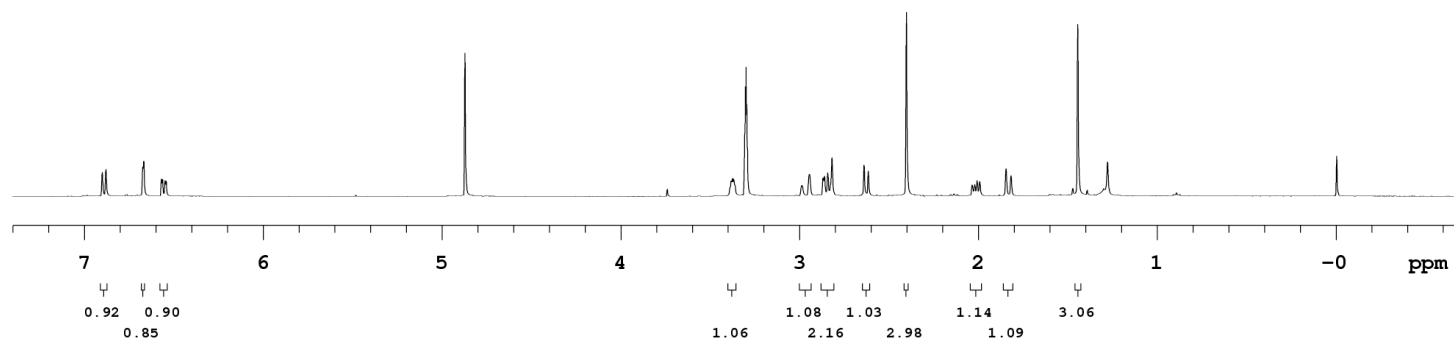



Mai-8-143-CARBON

Sample Name:

Data Collected on:  
Co.Chem.LSA.UMich.edu-vmrs400  
Archive directory:

Sample directory:

FidFile: Mai-8-143-CARBON2

Pulse Sequence: CARBON (s2pul)  
Solvent: cd3od  
Data collected on: Jan 21 2011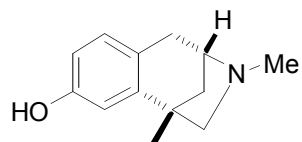**(+)-aphanorphine**

VARIAN

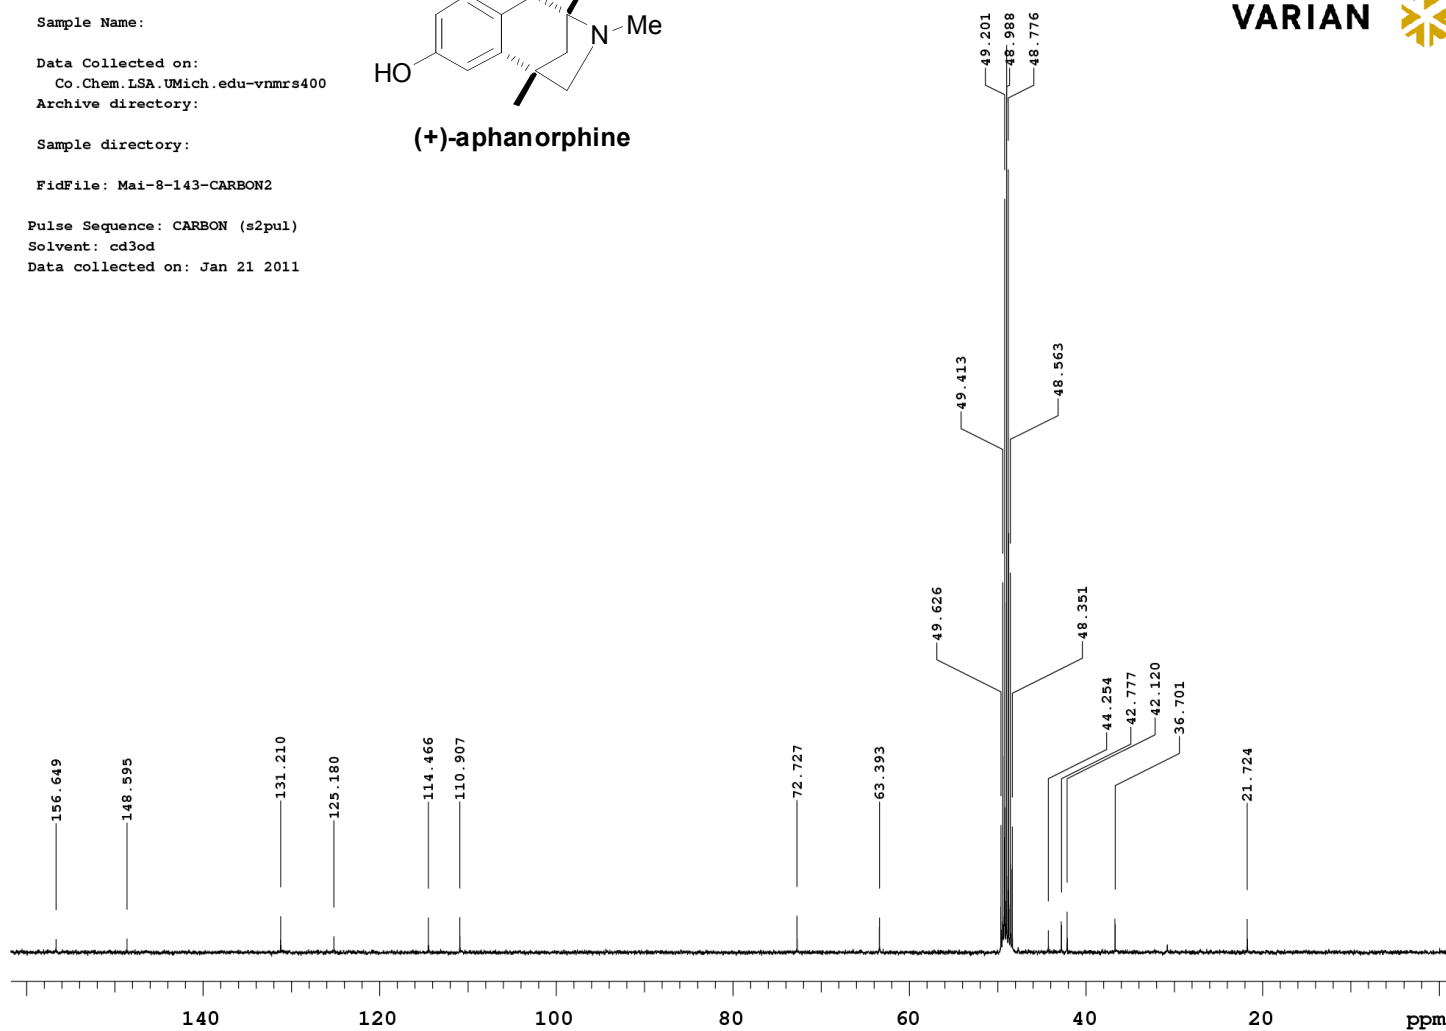

Supplement: NIHMS295638-supplement-1_si_001.pdf [file NIHMS295638-supplement-1_si_001.pdf]
